# Supplementary material
Source: PubMed Central journal article supplement (PMC9829863)
Supplement: 41598_2022_27247_MOESM1_ESM.pdf [file 41598_2022_27247_MOESM1_ESM.pdf]

## **Effect of breathwork on stress and mental health: A meta-analysis of randomised-controlled trials**

Mr Guy William Fincham<sup>1\*</sup>, MSc, Prof Clara Strauss<sup>1,2</sup>, DClInPsy, PhD, Dr Jesus Montero-Marin<sup>3,4,5\*</sup>, DClInPsy, PhD, Prof Kate Cavanagh<sup>1,2</sup>, DClInPsy, PhD

<sup>1</sup> Department of Psychology, University of Sussex, Brighton, UK

<sup>2</sup> Research & Development Department, Sussex Partnership NHS Foundation Trust, Brighton, UK

<sup>3</sup> Department of Psychiatry, Warneford Hospital, University of Oxford, Oxford, UK

<sup>4</sup> Teaching, Research & Innovation Unit, Parc Sanitari Sant Joan de Déu, Barcelona, Spain

<sup>5</sup> Consortium for Biomedical Research in Epidemiology & Public Health (CIBER Epidemiology & Public Health—CIBERESP), Madrid, Spain

\*Corresponding authors

**Appendices A, B, C, D**

## Appendix A.

**Table A.** Search strategy for published and unpublished scientific literature across five databases (primary outcome of self-reported/subjective stress and secondary outcomes) and two trial registries (primary outcome only). Wildcard search term (\*) could not be used in trial registers.

| Database              | Search                                                                                                                                                                           | Filters applied           |
|-----------------------|----------------------------------------------------------------------------------------------------------------------------------------------------------------------------------|---------------------------|
| PsycInfo              | <i>Title: ("Breath*" OR "Respir*") AND ("Random*" OR "RCT"). Anywhere/all fields: ("Stress*" OR "Anxi*" OR "Depress*")</i>                                                       | None                      |
| PubMed                | <i>Title: ("Breath*" OR "Respir*") AND ("Random*" OR "RCT"). Anywhere/all fields: ("Stress*" OR "Anxi*" OR "Depress*")</i>                                                       | None                      |
| Web of science        | <i>Title: ("Breath*" OR "Respir*") AND ("Random*" OR "RCT"). Anywhere/all fields: ("Stress*" OR "Anxi*" OR "Depress*")</i>                                                       | None                      |
| ProQuest              | <i>Title: ("Breath*" OR "Respir*") AND ("Random*" OR "RCT"). Anywhere/all fields: ("Stress*" OR "Anxi*" OR "Depress*")</i>                                                       | None                      |
| Scopus                | <i>Title: ("Breath*" OR "Respir*") AND ("Random*" OR "RCT"). Anywhere/all fields: ("Stress*" OR "Anxi*" OR "Depress*")</i>                                                       | None                      |
| <b>Trial registry</b> |                                                                                                                                                                                  |                           |
| ISRCTN                | <i>Anywhere: ("Breath" OR "Breathwork" OR "Breathing" OR "Breathe" OR "Respiration" OR "Respire" OR "Respiring" OR "Respiratory") AND "Stress"</i>                               | Completed<br>With results |
| ClinicalTrials.gov    | <i>Intervention/treatment: "Breath" OR "Breathwork" OR "Breathing" OR "Breathe" OR "Respiration" OR "Respire" OR "Respiring" OR "Respiratory".<br/>Outcome measure: "Stress"</i> | Completed<br>With results |

## Appendix B.

**Table B.** Summary information of all the included RCTs in the meta-analyses for all outcomes. \* = Study included primary outcome of self-reported/subjective stress. The 26 studies were completed from 2000 to 2021 and spanned 11 countries, half of which were based in the US and India. Study duration ranged from one day to seven months. The average age was 44, with 1,783 participants in total included in the meta-analyses, over half of whom identified as female. Roughly half of the participants were randomly allocated to a breathwork intervention (n=910) or non-breathwork control (n=873). Attrition rates (after the breathwork intervention began) ranged from 0-45%. In line with the PICO framework: 14 studies contained physical health populations, eight non-clinical and four mental health. While some interventions comprised various techniques, 20 were classed as having a primary focus on slow-paced breathwork, and six were classed as having a primary focus on fast-paced breathwork. Moreover, 12 studies were group-based, 12 individual-based, and two a combination of both; 15 were in-person, nine remotely or online, and two a combination of these modes. The minimum total estimated durations of an intervention/home practice ranged from 1-6,810 minutes; the minimum total estimated number of intervention/home practice sessions ranged from 1-173. Although intervention/home practice sessions differed in length, the intervention/home practice session frequency ranged from 2-21.5 times per week. Sixteen studies had inactive control groups and 10 had active controls. All studies for stress contained psychometrically well-validated outcome measures.

| Authors                    | Country | Population                                                             | Age M (SD)  | Sample N (I/C)                 | Gender (F/M) | Intervention                                                                                                                                            | Control                                                      | Measure used         | Intervention duration & time-points of measures |
|----------------------------|---------|------------------------------------------------------------------------|-------------|--------------------------------|--------------|---------------------------------------------------------------------------------------------------------------------------------------------------------|--------------------------------------------------------------|----------------------|-------------------------------------------------|
| Alberts et al. (2020)*     | Canada  | Childhood cancer survivors                                             | 44.1 (8.7)  | 32/33 (IA: 31/32)              | 35/30        | Spire Stone; asked to practice one of the app's brief deep-breathing exercises and/or take three deep breaths if app sent notification                  | Wait-list                                                    | PSS-10, GAD-7, PHQ-8 | T0; pre-I, T1; post-I 31 days after T0          |
| James et al. (2021)*       | Global  | Alzheimer's disease caregivers                                         | 60.3 (7.4)  | 14/14 (IA: 5/5)                | 14/5         | Heart Lock-In heart-focused breathing technique & meditation - slow deep breathing shifting focus to heart area and inducing positive thoughts/emotions | Wait-list                                                    | PSS-10, PROMIS       | T0; pre-I, T1; post-I 2 weeks after T0          |
| Mahendru et al. (2021)*    | India   | Asymptomatic/mildly symptomatic SARS-CoV-2 infected patients isolating | 35.5 (9.98) | 42/42 (IA: 42/42)              | 27/57        | Anulom vilom / Nadi shodhan pranayama [alternate nostril breathing] & meditation                                                                        | Standard care                                                | DASS-21              | T0; pre-I, T1; post-I 1 week after T0           |
| Ravindran et al. (2021)*   | India   | Outpatients with unipolar or bipolar depression                        | 39.7 (11.9) | 53/19 (IA: 53/19)              | 57/15        | Breath control (pranayamas) - Ujjayi, Cyclical rapid breathing Kapalabhati - 40-60 breaths/minute, 60-80 breaths/minute, 80-100 breaths/minute          | Psychoeducation protocol for unipolar and bipolar depression | PSS-10, MADRS        | T0; pre-I, T1; post-I 8 weeks after T0          |
| Rosenberg & Hamiel (2021)* | Israel  | University students during exam period                                 | 25.1 (2.6)  | 13/13/13 (two I's) (IA: 9/8/5) | 21/13        | I-1: CalmiGo - slowly extending exhale length; I-2: Self-directed slow, deep belly (diaphragmatic) breathing                                            | Psychoeducation handout focused on test anxiety              | DASS-21, TAI         | T0; pre-I, T1; post-I 2 weeks after T0          |

|                             |           |                                                          |              |                   |        |                                                                                                                                                                                                                                                                                   |                                                                                                            |                       |                                                                                                                                                                                                    |
|-----------------------------|-----------|----------------------------------------------------------|--------------|-------------------|--------|-----------------------------------------------------------------------------------------------------------------------------------------------------------------------------------------------------------------------------------------------------------------------------------|------------------------------------------------------------------------------------------------------------|-----------------------|----------------------------------------------------------------------------------------------------------------------------------------------------------------------------------------------------|
| Fiskin & Sahin (2018)*      | Turkey    | Pregnant women with gestational diabetes                 | 31 (3.2)     | 32/31 (IA: 30/30) | 63 F   | Diaphragmatic breathing exercises - inhaling through the nose and exhaling through the mouth                                                                                                                                                                                      | Standard care                                                                                              | DASS-42               | T0; pre-I, T1; post-I 30 days after T0                                                                                                                                                             |
| Dhruva et al. (2012)*       | US        | Chemotherapy cancer patients                             | 54.2 (13.25) | 12/11 (IA: 8/8)   | 14/2   | Pranayama yoga breathing (4 techniques - breath observation, ujjayi breathing [ocean breath / resistance breathing], kapalabhati [skull shining breath] - but in slow manner, nadi shodhana [alternate nostril breathing])                                                        | Usual care                                                                                                 | PSS-10, HADS          | n/a: I-group received pranayama during 2 consecutive cycles of chemotherapy; C-control group received usual care during first cycle & received pranayama during their second cycle of chemotherapy |
| Gerbarg et al. (2015)*      | US        | Inflammatory bowel disease patients                      | 53.9 (15.2)  | 16/13 (IA: 14/11) | 17/12  | Breath-body-mind [various breath practices], movement, meditation, & coherent breathing [core technique] - 5 breaths/minute                                                                                                                                                       | Educational seminar on IBD                                                                                 | PSQ-30, BAI, BDI      | T0; pre-I, T1; 6 weeks after, T2; post-I 24 weeks after T0 (in study: T1 and T2 classed as post-I & follow-up, respectively)                                                                       |
| Goldstein et al. (2020)*    | US        | University students                                      | 20.7 (3)     | 55/53 (IA: 37/32) | 50/19  | Sudarshan Kriya Yoga (3/4 different rhythms of kapalabhati - slow, medium, medium-fast, fast) - by Art of Living Foundation                                                                                                                                                       | Wisdom on Wellness (WoW) psychoeducation stress management workshop                                        | PSS-10                | T0; pre-I, T1; 6 weeks after workshop, T2; post-I 3 months after T1 (in study, T1 and T2 classed as post-I & follow-up, respectively)                                                              |
| Huang et al. (2019)*        | US        | Female overactive bladder syndrome patients              | 61 (11.2)    | 79/82 (IA: 74/76) | 161 F  | RESPeRATE - synchronises breathing to tones with target of slow breathing, below 10 breaths/minute                                                                                                                                                                                | RESPeRATE with music but without slow-paced breathing guidance                                             | PSS-10, HADS          | T0; pre-I, T1; post-I 12 weeks after T0                                                                                                                                                            |
| Laudenslager et al. (2015)* | US        | Caregivers of patients undergoing bone marrow transplant | 53.5 (12.3)  | 74/74 (IA: 73/71) | 112/35 | Psychoeducation paced respiration & relaxation (PEPRR) [using RESPeRATE] - less than 10 breaths/minute                                                                                                                                                                            | Treatment-as-usual psychosocial care                                                                       | PSS-10, STAI-S, CES-D | T0; pre-I prior to transplant), T1; one month after transplant, T2; post-I three months after transplant                                                                                           |
| Shehab (2021)*              | US        | Young adults with elevated stress                        | 21.1 (2.86)  | 40/40 (IA: 33/37) | 53/27  | Resonant frequency [coherent] breathing training - 4.5-6 breaths/minute                                                                                                                                                                                                           | Wait-list                                                                                                  | PSS-10, STAI-S, BDI   | T0; pre-I, T1; post-I 4 weeks after T0                                                                                                                                                             |
| Carter et al. (2013)        | Australia | Vietnam war male veterans with PTSD                      | 58.5 (4.2)   | 16/15 (IA: 14/11) | 31 M   | Sudarshan Kriya Yoga (adapted for veterans) [cyclical breathing - 3 different speeds]                                                                                                                                                                                             | Wait-list                                                                                                  | CES-D                 | T0; pre-I, T1; 6 weeks after workshop, T2; post-I 6 months after T1 (in study, T1 and T2 classed as post-I & follow-up, respectively)                                                              |
| Evaristo et al. (2020)      | Brazil    | Outpatients with asthma                                  | 50.2 (9.5)   | 25/29 (IA: 25/29) | 39/15  | Breathing exercise program based on Pranayama Yoga breathing technique developed by 2 senior yoga instructors - breathing exercises aimed to stimulate nasal and diaphragmatic breathing, to increase expiratory time, to slow respiratory flow, and to regulate breathing rhythm | Aerobic training program - performed with an indoor treadmill initiated at 60% of heart rate (HR) recovery | HADS                  | T0; pre-I, T1; post-I 12 weeks after T0, T2; follow-up 3 months after T1                                                                                                                           |
| Novaes et al. (2020)        | Brazil    | Healthy young adults                                     | 25.1 (4.3)   | 15/15 (IA: 15/15) | 15/15  | Bhastrika pranayama - cycles of Kapalabhati, alternate nostril breathing and apnoea (breath holds)                                                                                                                                                                                | Ludic cognitive activities such as crosswords, puzzles, domino, checkers, and card                         | STAI-S                | T0; pre-I, T1; post-I 4 weeks after T0                                                                                                                                                             |

|                             |        |                                                              |             |                                   |               |                                                                                                                                                                                                                                                           |                                                                                                                                                                                                                      |                    |                                                                                                                                       |
|-----------------------------|--------|--------------------------------------------------------------|-------------|-----------------------------------|---------------|-----------------------------------------------------------------------------------------------------------------------------------------------------------------------------------------------------------------------------------------------------------|----------------------------------------------------------------------------------------------------------------------------------------------------------------------------------------------------------------------|--------------------|---------------------------------------------------------------------------------------------------------------------------------------|
| Pham et al. (2016)          | Global | General population adults recruited online                   | n/a (18+)   | 31/32 (IA: 31/32)                 | 31/31/1 other | Flowy app - mHealth game that engages users in a series of minigames using breathing retraining exercises / diaphragmatic breathing                                                                                                                       | games, also in the presence of an instructor<br>Weekly newsletter with curated content on breathing retraining exercises, "Flowy" game development, mindfulness meditation, and similar content relevant to "Flowy." | GAD-7              | T0; pre-I, T1; post-I 4 weeks after T0                                                                                                |
| Janakiramaiah et al. (2000) | India  | Hospitalised untreated melancholic depressives               | 38.7 (7.4)  | 15/15/15 (two C's) (IA: 15/15/15) | 45 M          | Sudarshan Kriya Yoga with supine rest                                                                                                                                                                                                                     | C1: Electroconvulsive therapy (ECT), C2: imipramine (IMN)                                                                                                                                                            | HDRS               | T0; pre-I after hospitalisation, T1; one week after T0, T2; two weeks after T0, T3; three weeks after T0, T4; post-I 4 weeks after T0 |
| Kamath et al. (2017)        | India  | Healthy and yoga-naïve medical students                      | n/a (19-24) | 15/15 (IA: 15/15)                 | 21/9          | Alternate Nostril Breathing before simulated public speaking test                                                                                                                                                                                         | Sitting in room before simulated public speaking test                                                                                                                                                                | VAMS-A             | T0; 15 minutes pre-I, T1; post-I 55 minutes after T0 (single session)                                                                 |
| Sureka et al. (2014)        | India  | Male prisoners with non-psychotic psychiatric disorders      | 36.1 (11.4) | 116/116 (IA: 115/115)             | 230 M         | Sudarshan Kriya and related practices (SK&P): 1) three staged Ujjayi breathing, (2) bellows breath (Bhastrika), (3) om chant, (4) SK and (5) ANB                                                                                                          | Sit in armchair and pay gentle attention to breath                                                                                                                                                                   | PGWB-Anx, PGWB-Dep | T0; pre-I, T1; post-I 6 weeks after T0                                                                                                |
| Valenza et al. (2013)       | Spain  | Male patients hospitalised with acute COPD exacerbation      | 75.2 (6.1)  | 23/23 (IA: 23/23)                 | 46 M          | Controlled breathing program included relaxation exercises, pursed lips breathing, and active expiration                                                                                                                                                  | Standard care                                                                                                                                                                                                        | HADS               | T0; pre-I after hospitalisation, T1; post-I at discharge                                                                              |
| Chung et al. (2010)         | Taiwan | Patients with coronary heart disease                         | 71.5 (11.9) | 33/39 (IA: 28/34)                 | 19/43         | Home-based deep-breathing programme: slow and deep diaphragmatic breathing technique at ~4-7 breaths/minute                                                                                                                                               | Individual stress-management session and then weekly telephone support delivered by the same nurse who taught the breathing session                                                                                  | BDI                | T0; pre-I, T1; 2 during treatment, T2; post-I 4 weeks after T0                                                                        |
| Teng et al. (2018)          | Taiwan | Heart failure patients                                       | 52 (13)     | 45/45 (IA: 41/43)                 | 18/72         | Walking with controlled breathing: abdominal deep breathing patterns were designed and taught; inhalation and exhalation times were targeted at a 1:2 ratio, and breathing rates were allowed to decrease to <10 times per min before walking would begin | Usual care                                                                                                                                                                                                           | HADS               | T0; pre-I, T1; post-I 12 weeks after T0                                                                                               |
| Tsai et al. (2015)          | Taiwan | Chronic kidney disease patients on maintenance haemodialysis | n/a (18+)   | 32/32 (IA: 32/25)                 | n/a           | Audio guided breathing training in a quiet room at the dialysis centre: Slow and deep nasal / diaphragmatic breathing technique at ~4-7 breaths/minute                                                                                                    | Wait-list                                                                                                                                                                                                            | BDI                | T0; pre-I, T1; post-I 6 weeks after T0                                                                                                |

|                         |        |                                                                |                     |                   |        |                                                                                                                                                                                                   |                                                                |        |                                                                                                                        |
|-------------------------|--------|----------------------------------------------------------------|---------------------|-------------------|--------|---------------------------------------------------------------------------------------------------------------------------------------------------------------------------------------------------|----------------------------------------------------------------|--------|------------------------------------------------------------------------------------------------------------------------|
| Atilgan & Tuncer (2021) | Turkey | Mothers of children with special health care needs             | 34.9 (6.48)         | 23/23 (IA: 23/20) | 46 F   | Diaphragmatic and pursed lip breathing exercises with core stabilisation exercises (BSET)                                                                                                         | Stabilisation exercises (SET)                                  | STAI-S | T0; pre-I, T1; post-I 8 weeks after T0                                                                                 |
| Thomas et al. (2009)    | UK     | Asthmatics with impaired health status managed in primary care | 46 (range: 33-57.3) | 94/89 (IA: 94/89) | 112/71 | Exercises: diaphragmatic and nasal breathing techniques; Education: normal breathing and possible effects of abnormal "dysfunctional breathing" (over-breathing, mouth and upper chest breathing) | Asthma education: without providing personalised asthma advice | HADS   | T0; pre-I, T1; one month post-I, T2; follow-up 6 months post-I                                                         |
| Van Denburg (2020)      | US     | Women undergoing MRI-guided breast biopsy                      | 47.7 (12.1)         | 23/25 (IA: 23/25) | 48 F   | Breathing at a rate of 6 breaths/minute (breathing in for four counts and out for six counts [cadence breathing]) and music                                                                       | Usual care (including music) during MRI-guided biopsy          | STAI-S | T0; pre-I before biopsy; T1; post-I and biopsy (T0 and T1 completed in single session), T2; 24 hours post-I and biopsy |

*I: breathwork intervention group; C: non-breathwork control group; DASS: Depression Anxiety Stress Scales; PSS: Perceived Stress Scale; HADS: Hospital Anxiety and Depression Scale; PHQ: Patient Health Questionnaire depression scale; MADRS: Montgomery-Asberg Depression Rating Scale; TAI: Test Anxiety Inventory; BDI: Beck Depression Inventory; BAI: Beck Anxiety Inventory; VAMS-A: Visual Analogue Mood Scale-Anxiety; PGWB-Anx: The Psychological General Well-Being Index-Anxiety subscale; PGWB-Dep: The Psychological General Well-Being Index-Depressed Mood; GAD-7: Generalised Anxiety Disorder Assessment; HDRS: Hamilton Depression Rating Scale; STAI-S: The State-Trait Anxiety Inventory-State; PROMIS: PROMIS Health Organization anxiety short form; PSQ: Perceived Stress Questionnaire; CES-D: Center for Epidemiological Studies-Depression Scale; n/a: data not reported.*

## Appendix C

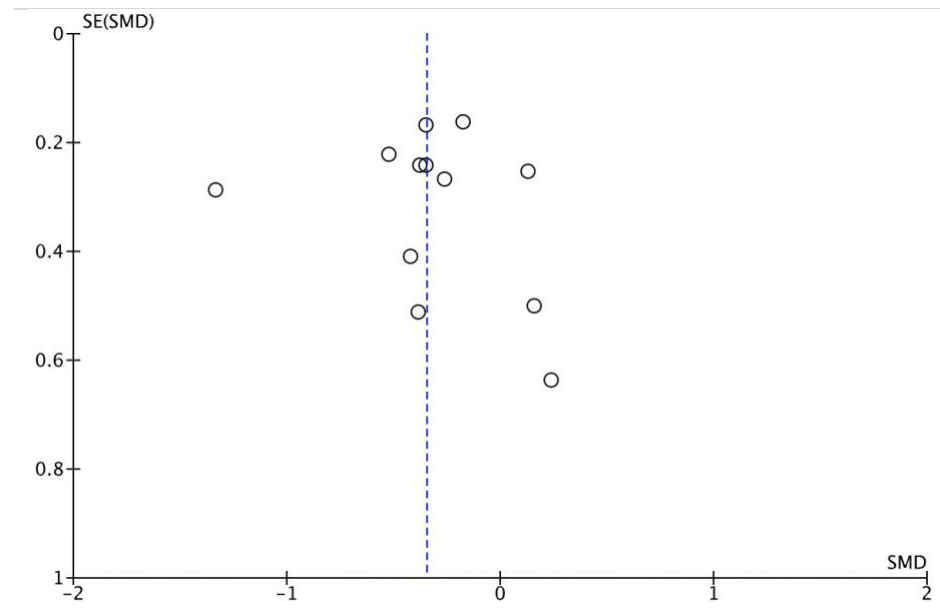

**Figure C.** Funnel plot comparing breathwork to controls on primary outcome of self-reported/subjective stress at post-intervention. Dotted blue line corresponds to effect estimate and circles represent individual studies. SE = standard error, SMD = standardised mean difference. Figure produced using RevMan v5.4.

## Appendix D

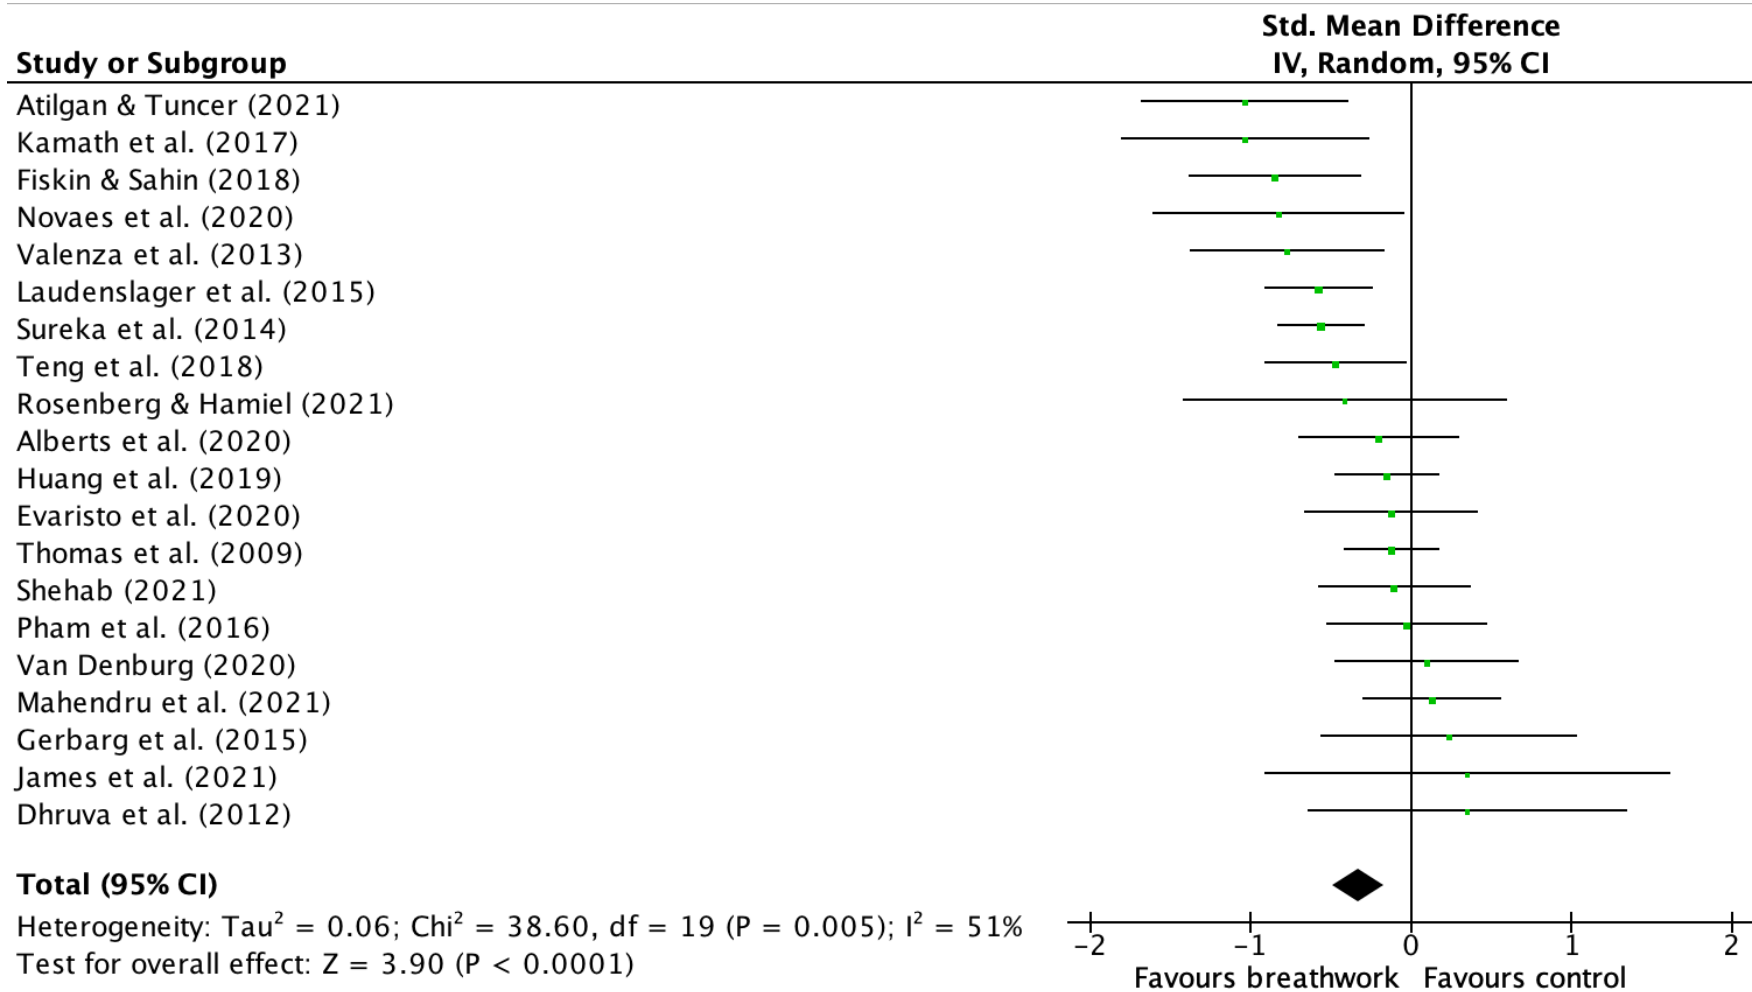

**Figure D1.** Forest plot comparing breathwork interventions to control groups on secondary outcome of self-reported/subjective anxiety at post-intervention. Green squares and their size represent individual studies and weight of study, respectively. Black lines through squares are 95% CIs and black diamond is the cumulative effect size with 95% CIs. More negative values denote larger effect of breathwork on self-reported/subjective anxiety in comparison to control condition. Figure produced using RevMan v5.4.



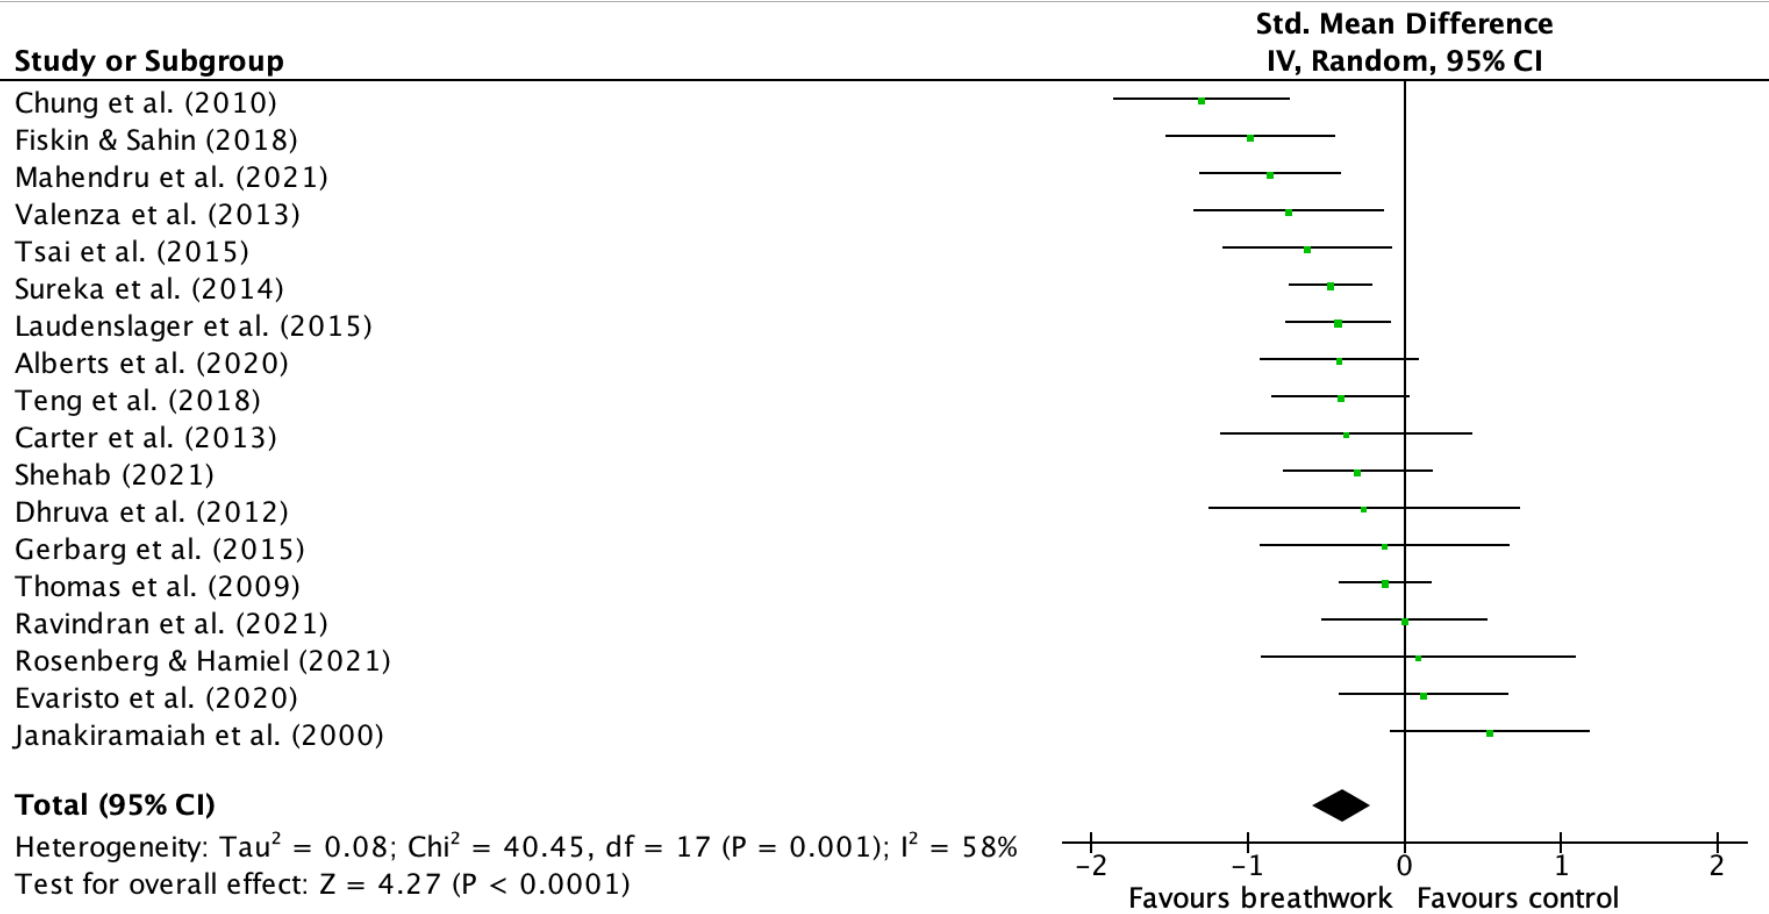

**Figure D2.** Forest plot comparing breathwork interventions to control groups on secondary outcome of self-reported/subjective depression at post-intervention. Green squares and their size represent individual studies and weight of study, respectively. Black lines through squares are 95% CIs and black diamond is the cumulative effect size with 95% CIs. More negative values denote larger effect of breathwork on self-reported/subjective depressive symptoms in comparison to control condition. Figure produced using RevMan v5.4.
